# Supplementary material for: Forecasting the unrevealed surface-controlled photocatalytic water splitting in two-dimensional Ag2Se with ultrafast carrier mobility: a first-principles study
Source: Royal Society of Chemistry journal article supplement (doi:10.1039/d3cy00628j), 2023-01-01
Supplement: d3cy00628j1.pdf [file d3cy00628j1.pdf]

## Supporting Information

### Forecasting the unrevealed surface controlled photocatalytic water splitting in two-dimensional Ag<sub>2</sub>Se with ultrafast carrier mobility: A first-principles study

Yee Hui Robin Chang <sup>a, \*</sup>, Keat Hoe Yeoh <sup>b, \*</sup>, Junke Jiang <sup>c</sup>, Soo See Chai <sup>d</sup>, Yusuf Zuntu Abdullahi <sup>e, f</sup>, Heng Yen Khong <sup>a</sup>, Thong Leng Lim <sup>g</sup>, Moi Hua Tuh <sup>h</sup>

<sup>a</sup> Faculty of Applied Sciences, Universiti Teknologi MARA, Cawangan Sarawak, 94300 Kota Samarahan, Sarawak, Malaysia

<sup>b</sup> Department of Electrical and Electronic Engineering, Lee Kong Chian Faculty of Engineering and Science, Universiti Tunku Abdul Rahman, 43000 Kajang, Selangor, Malaysia

<sup>c</sup> Materials Simulation and Modelling, Department of Applied Physics, Eindhoven University of Technology, 5612 Eindhoven, The Netherlands

Present Address: Univ Rennes, ENSCR, CNRS, ISCR-UMR 6226, F-35000 Rennes, France

<sup>d</sup> Faculty of Computer Science & Information Technology (FCSIT), Universiti Malaysia Sarawak, 94300 Kota Samarahan, Sarawak, Malaysia

<sup>e</sup> Department of Physics, Faculty of Science, Kaduna State University, PMB 2339, Kaduna, Nigeria

<sup>f</sup> Department of Physics, Adnan Menderes University, Aydın 09010, Turkey

<sup>g</sup> Faculty of Engineering and Technology, Multimedia University, Jalan Ayer Keroh Lama, 75450 Melaka, Malaysia

<sup>h</sup> Faculty of Computer & Mathematical Sciences, Universiti Teknologi MARA, Cawangan Sarawak, 94300 Kota Samarahan, Sarawak, Malaysia

\*Electronic mail: robincyh@uitm.edu.my; keathoe.yeoh@gmail.com

Keywords: Photocatalysis; Absorbance; Monolayer; Water splitting; Electronic structure

#### S1 Unit cell POSCAR for optimized Ag<sub>2</sub>Se monolayer

Ag<sub>2</sub>Se

1.0000000000000000

5.8560390000000000 -0.0207510000000000 -0.0435000000000000

0.0243210000000000 5.8809839999999998 0.0036040000000000

-0.1850750000000000 0.0155000000000000 17.7377740000000017

Ag Se

4 2

Direct

0.6851229999999973 0.7045510000000021 0.4977590000000021

0.1844719999999995 0.7193340000000035 0.5008369999999971

0.6973569999999967 0.2048819999999978 0.4989769999999965

0.1993610000000032 0.2178729999999973 0.5021509999999978

0.9418170000000003 0.4593679999999978 0.4168280000000024

0.4511639999999986 0.9584430000000026 0.5834479999999971

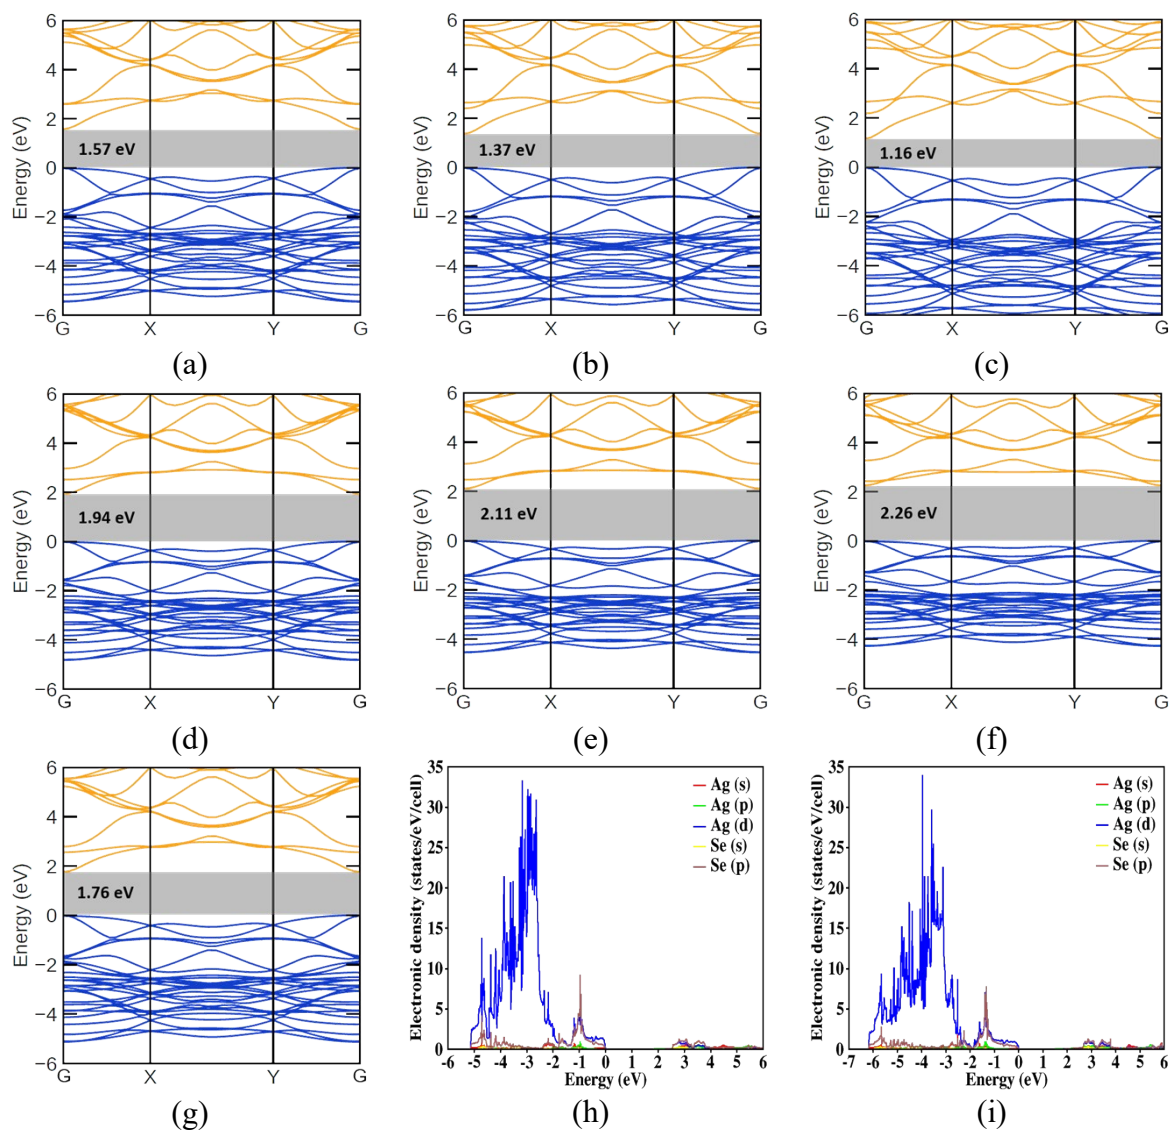

**S2** Detailed electronic band structures of  $\text{Ag}_2\text{Se}$  monolayer under (a) -2%, (b) -4%, (c) -6%, (d) 2%, (e) 4%, (f) 6% and (g) 0% biaxial straining, at PBE level. Calculated PDOS of  $\text{Ag}_2\text{Se}$  monolayer under (h) 0% and (i) -6%, at PBE level.

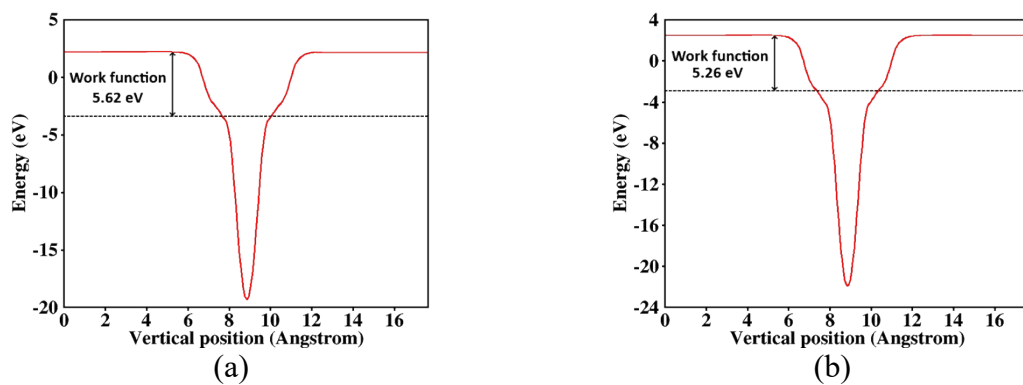

**S3** Electrostatic potential for  $\text{Ag}_2\text{Se}$  monolayer (a) 0% and (b) -6% biaxial straining.

#### S4 SLME computational details

Theoretical maximum solar cell efficiency can be calculated using the following formula:

$$\eta = \frac{P_m}{P_{in}}$$

where  $P_m$  is the highest achievable power density of the thin-film solar absorber material, while  $P_{in}$  is the incident power density of the entire solar spectrum. The maximum output power density  $P=JV$  of the material can be found utilizing J-V characteristics of solar cell as proposed by Yu and Zunger [1]. Here, J indicates the total current density, while V represents the potential over the absorber layer, as seen in the following relationship:

$$J = J_{sc} - J_r \left( e^{eV/k_B T} - 1 \right)$$

in which  $J_{sc}$ ,  $J_r$ ,  $k_B$  and T denote, respectively, the short-circuit current, the total recombination current density, the Boltzmann constant, and the temperature. Absorptivity  $\alpha(E)$ , photon flux from incident solar spectrum  $I_{sun}(E)$  (AM1.5G) and black-body spectrum  $I_{bb}(E,T)$  can be used to calculate  $J_{sc}$  and  $J_r$ , as follows:

$$J_{sc} = e \int_0^{\infty} \alpha(E) I_{sun}(E) dE$$

$$J_r = e \int_0^{\infty} \alpha(E) I_{bb}(E,T) dE$$

where  $\alpha(E)$  and L are the absorbance coefficient and thickness of the thin film, respectively. Total recombination current density is largely contributed by radiative recombination current density  $J_{rad}$  and non-radiative recombination current density  $J_{non-rad}$ .

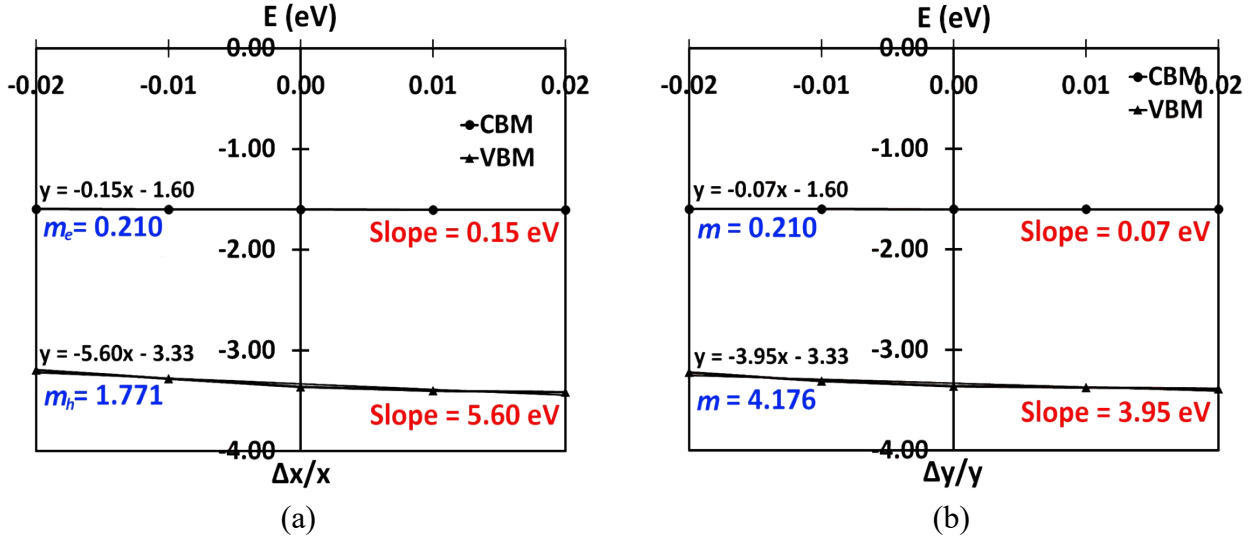

**S5** The displacement of CBM and VBM for Ag<sub>2</sub>Se monolayer as a function of applied strain in the (x) zigzag and (y) armchair directions, respectively. The linear fit offers the deformation potentials of the monolayer under study.  $m_e$  and  $m_h$  are in electron rest mass unit.

**S6** Solar-to-hydrogen (STH) efficiency

Prediction of STH for unstrained and strained Ag<sub>2</sub>Se monolayers were estimated using modified MATLAB coding based on the following:

$$\eta_{STH} = \frac{1.23 \int_E^{\infty} \frac{P(x)}{x} dx}{\int_{E_g}^{\infty} P(x) dx}$$

where  $x$ ,  $P(x)$  and  $E$  are the photon energy  $\hbar\omega$ , AM1.5G solar energy flux at  $\hbar\omega$  and actual photon energy used for water splitting, computed by:

$$E = \begin{cases} E_g, [\chi(H_2) \geq 0.2, \chi(O_2) \geq 0.6] \\ E_g + 0.2 - \chi(H_2), [\chi(H_2) < 0.2, \chi(O_2) \geq 0.6] \\ E_g + 0.6 - \chi(O_2), [\chi(H_2) \geq 0.2, \chi(O_2) < 0.6] \\ E_g + 0.8 - \chi(H_2) - \chi(O_2), [\chi(H_2) < 0.2, \chi(O_2) < 0.6] \end{cases}$$

In this work,  $\chi(\text{H}_2)$  and  $\chi(\text{O}_2)$  represent the HER and OER overpotential, forecasted by HSE hybrid functional to be 0.74 (0.36) and 0.71 (0.31) eV for unstrained  $\text{Ag}_2\text{Se}$  (-6% strained) monolayer, respectively.

[1] L. Yu and A. Zunger (2012). Identification of Potential Photovoltaic Absorbers Based on First-Principles Spectroscopic Screening of Materials. *Phys. Rev. Lett.*, 108, 068701.
